# Supplementary material for: Comparison of Chemical Sensitivity of Fresh and Long-Stored Heat Resistant Neosartorya fischeri Environmental Isolates Using BIOLOG Phenotype MicroArray System
Source: PubMed Central journal article supplement (PMC4729462; doi:10.1371/journal.pone.0147605), 2016-01-27
Supplement: pone.0147605.s002.pdf [file pone.0147605.s002.pdf]

**S2 Table. Studied chemical compound divided into structure and functional groups.**

| Group                       | Substance                         |                                 |                                    |                          |                                    |
|-----------------------------|-----------------------------------|---------------------------------|------------------------------------|--------------------------|------------------------------------|
| Anions                      | Sodium dichromate                 | Sodium Selenite                 | Sodium metavanadate                | Potassium iodide         | Sodium arsenate                    |
|                             | Sodium metaborate                 | Sodium (meta)periodate          | Sodium Arsenite                    | Sodium Cyanate           | Sodium Orthovanadate               |
|                             | Sodium Cyanide                    | Sodium Thiosulfate              | Sodium metasilicate                | Potassium Chromate       | Sodium Fluoride                    |
|                             | Boric acid                        | Sodium Selenate                 |                                    |                          |                                    |
| Cations                     | Dodecyltrimethyl ammonium bromide | Manganese(II) chloride          | Magnesium chloride                 | Copper(II) sulfate       | Nickel chloride                    |
|                             | Lithium chloride                  | Thallium(I) acetate             | Ammonium Sulfate                   | Cadmium Chloride hydrate | Chromium(III) Chloride hexahydrate |
|                             | Cupric Chloride Dihydrate         | Aluminum sulfate                | Palladium(II) Chloride             | Zinc chloride            | Cobalt(II) Chloride hexahydrate    |
| Membrane function compounds | Guanidine hydrochloride           | Nystatin                        | Dodecyltrimethyl ammonium bromide  | Protamine sulfate        | Cetylpyridinium chloride           |
|                             | Myclobutanil                      | Benzethonium Chloride           | Poly-L-lysine hydrochloride        | Propiconazole            | Miconazole Nitrate                 |
|                             | Amitriptyline hydrochloride       | Domiphen bromide                | Niaproof                           |                          |                                    |
| Chelators                   | 2,2'-Dipyridyl                    | 1-Hydroxypyridine2-thione       | EDTA                               | BAPTA                    | EGTA                               |
|                             | Sodium Pyrophosphate Decahydrate  |                                 |                                    |                          |                                    |
| Cyclic compounds            | Promethazine                      | Compound 48/80                  | Caffeine                           | Benzamidine              | Cycloheximide                      |
|                             | Doxycycline Hyclate               | Chlortetracycline hydrochloride | Methyl Viologen Dichloride hydrate | Berberine chloride       | Chlorpromazine hydrochloride       |
| Organic compounds           | L-Aspartic acid bhydroxamate      | L-Glutamic acid ghydroxamate    | L-Arginine hydroxamate             | Glycine hydroxamate      | Miltefosine                        |
|                             | D-Serine                          | Azaserine                       | Glycine hydrochloride              | Sodium Caprylate         | 2-Deoxy-Dglucose                   |
|                             | Zaragozic acid A                  | Blasticidin hydrochloride       | Thioridazine hydrochloride         | Sodium Benzoate          | 6-Azauracil                        |
|                             | $\alpha$ -Monothioglycerol        | Citric acid Trisodium Salt      | Chloroalanine hydrochloride        | Sodium salicylate        | Succinic acid                      |

|                    |                               |                    |                         |                        |                             |
|--------------------|-------------------------------|--------------------|-------------------------|------------------------|-----------------------------|
|                    | Malic acid                    | Tartaric acid      | Fumaric acid            | 5-Fluorocytosine       | Ibuprofen                   |
|                    | Cinnamic acid                 | 5-Fluorouracil     | D,L-Serine hydroxamate  | Aminacrine             | Thialysine                  |
|                    | Clomiphene citrate            | Chloroquine        |                         |                        |                             |
| Antibiotics        | Neomycin                      | D-Cycloserine      | Polymyxin B             | Ceftriaxone            | Cephalotin                  |
|                    | Dequalinium Chloride          | Apramycin Sulfate  | Pentamidine Isethionate | Amphotericin B         | Tobramycin                  |
|                    | Hygromycin B                  | Paromomycin        | Kanamycin Monosulfate   |                        |                             |
| Nitrogen compounds | Diamide                       | Thiourea           | 3-Amino-1,2,4triazole   | Urea hydrogen peroxide | Hydroxylamine hydrochloride |
|                    | Sodium Nitrite                | Cisplatin          | Isoniazid               | Hydroxyurea            | Tetrazolium Violet          |
|                    | Mechlorethamine hydrochloride | Fluorodeoxyuridine | Sodium Azide            | 4-Aminopyridine        |                             |
